# Supplementary material for: Efficient noise suppression via controlling the optical cavity in near-infrared organic photoplethysmography sensors
Source: Royal Society of Chemistry journal article supplement (doi:10.1039/d3tc04489k), 2024-01-01
Supplement: d3tc04489k1.pdf [file d3tc04489k1.pdf]

**Supporting Information**

**Efficient noise suppression via controlling the optical cavity  
in near-infrared organic photoplethysmography sensors**

*Zhao Yang,<sup>a#</sup> Byung Gi Kim,<sup>b#</sup> Woongsik Jang<sup>a</sup> and Dong Hwan Wang<sup>\*ab</sup>*

<sup>a</sup>School of Integrative Engineering, Chung-Ang University, 84 Heukseok-ro, Dongjak-gu, Seoul 06974, Republic of Korea

<sup>b</sup>Department of Intelligent Semiconductor Engineering Chung-Ang University 84 Heukseok-ro, Dongjak-gu, Seoul 06974,  
Republic of Korea

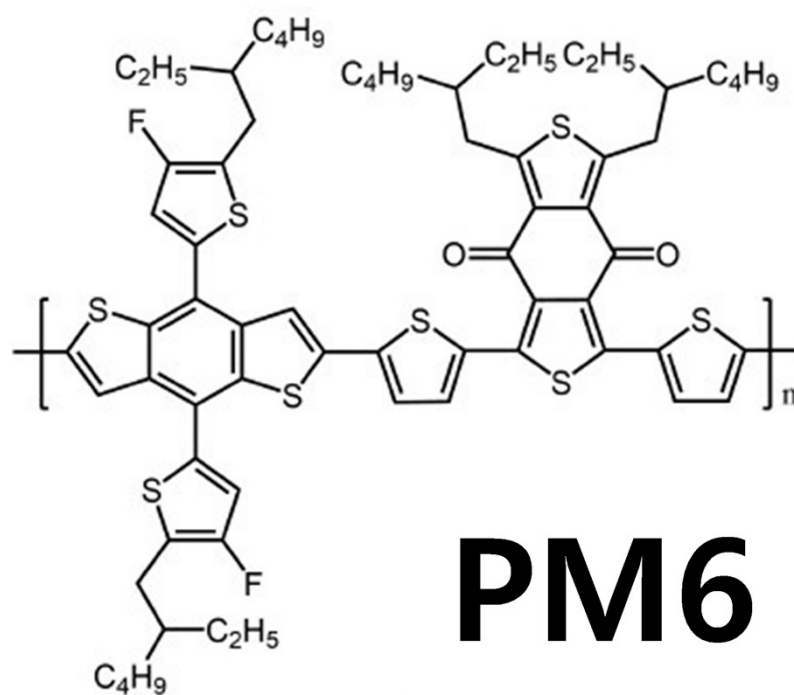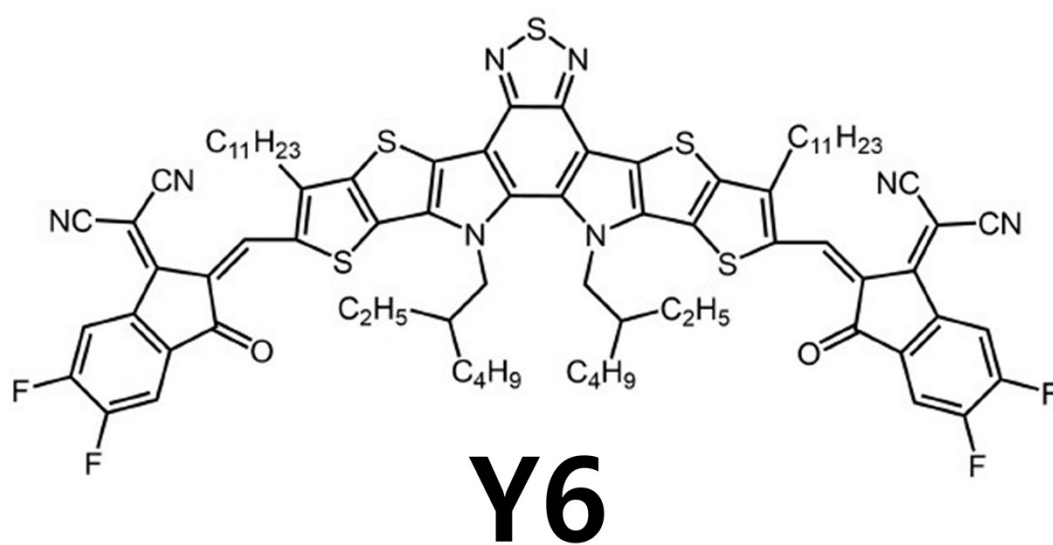

Fig. S1. Molecular structures of polymer donor PM6 and small-molecule acceptor Y6.

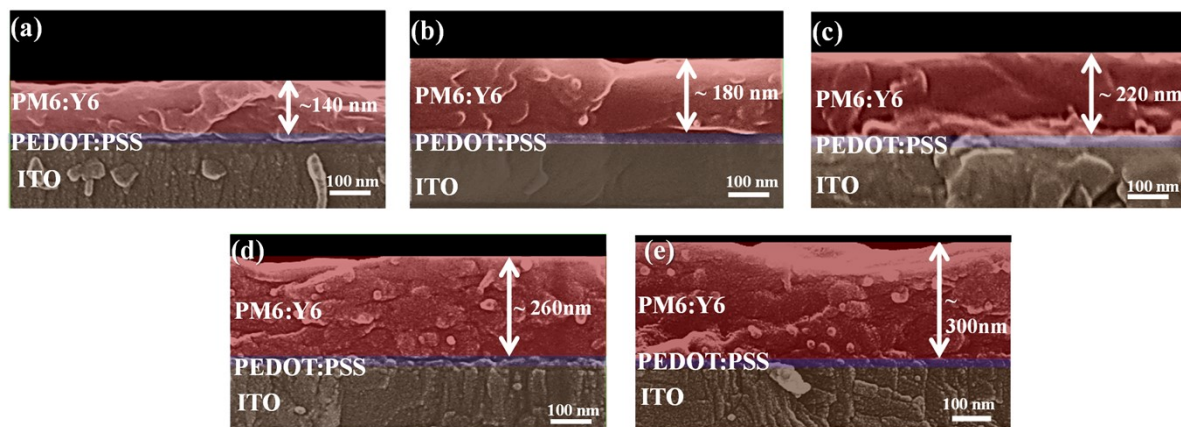

**Fig. S2.** Cross-sectional analysis of field emission scanning electron microscopy (FE-SEM) images for different thicknesses of the active layer: thickness-controlled ITO/PEDOT:PSS/PM6:Y6.

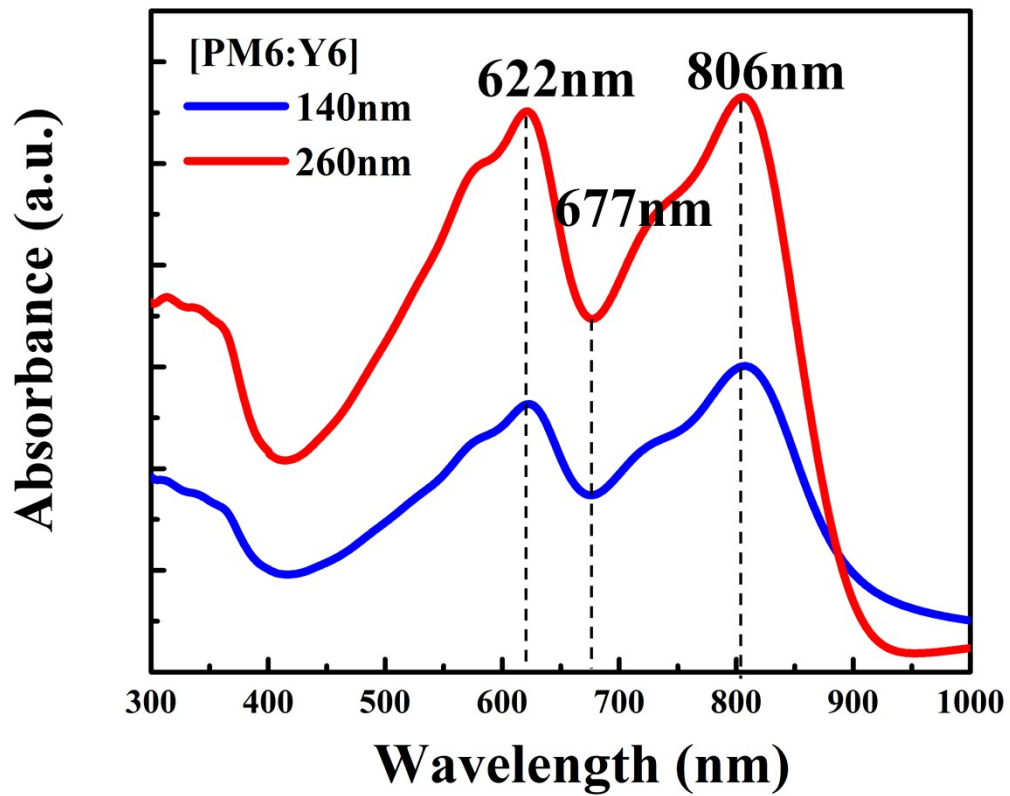

**Fig. S3.** Absorbance spectra characteristics of each PM6:Y6 film according to the different thicknesses of the PM6:Y6 active layer.

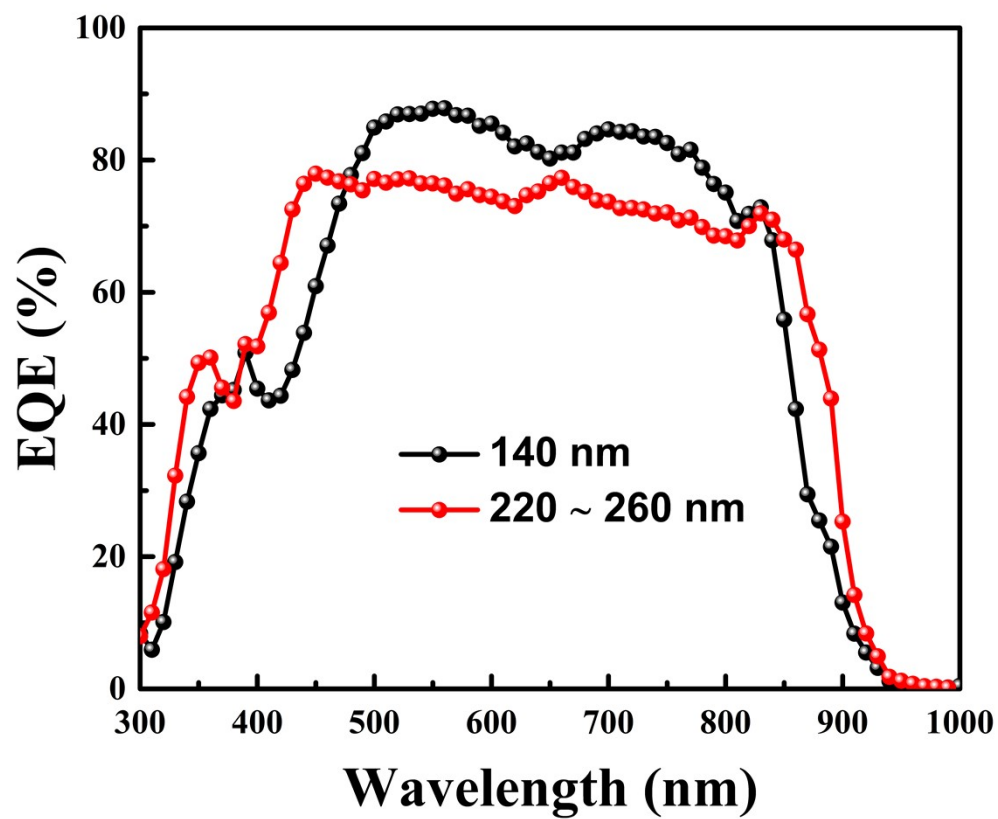

Fig. S4. EQE spectrum comparison of OPDs under each thickness with the reference and the other condition.

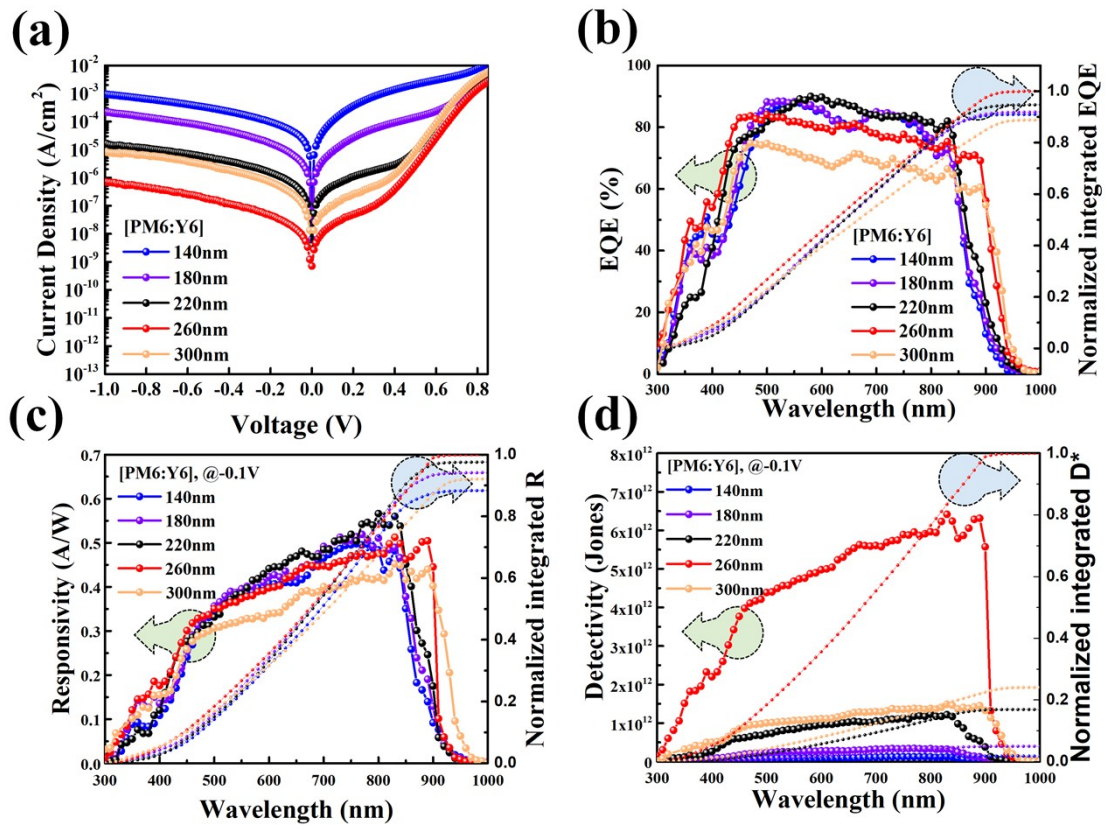

**Fig. S5** (a) Dark J-V, (b) EQE, (c) responsivity (-0.1 V), (d) detectivity (-0.1 V), characteristics of all PM6:Y6 OPDs.

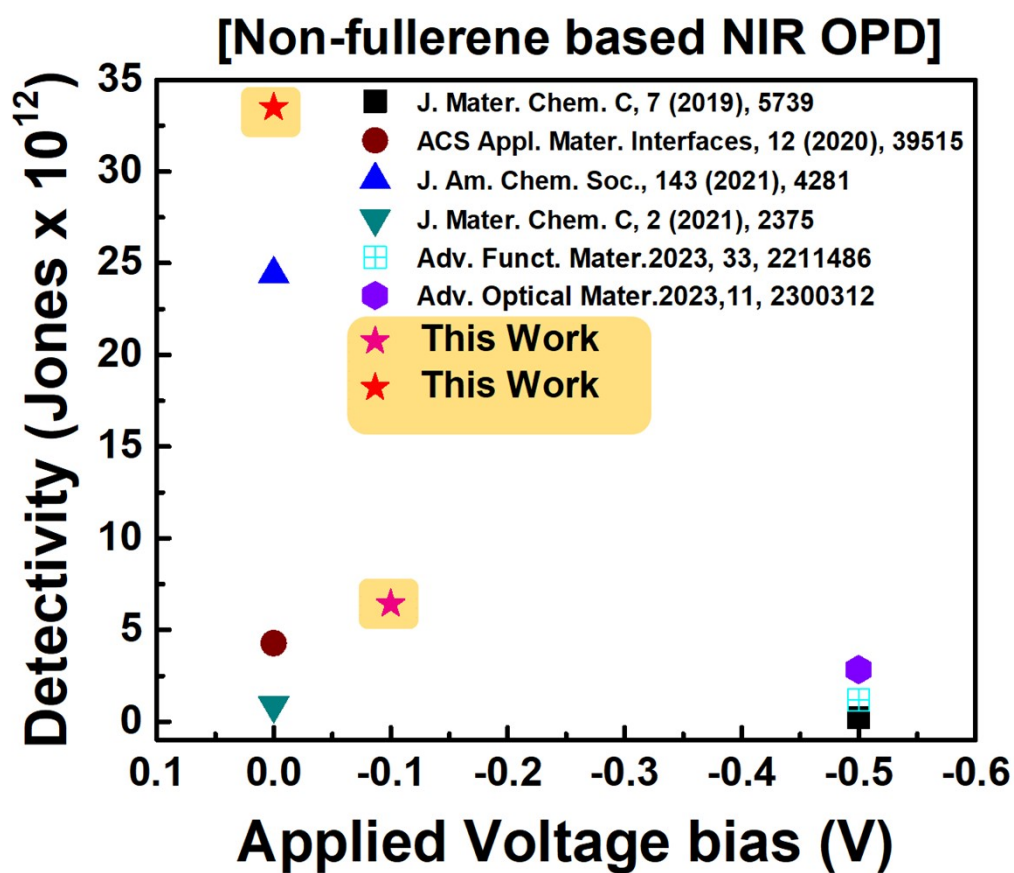

Fig. S6. Reported performance chart of non-fullerene based NIR OPDs.

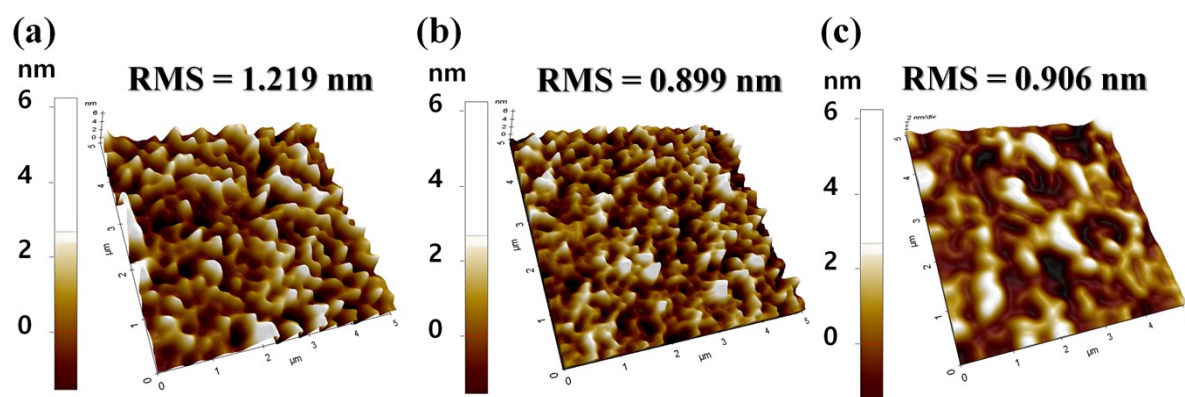

**Figure S7.** (a-c) Supplementary topography analysis of atomic force microscopy (AFM) 3D images of the PM6:Y6 with different thicknesses: (a) 180 nm, (b) 220 nm, (c) 300 nm.



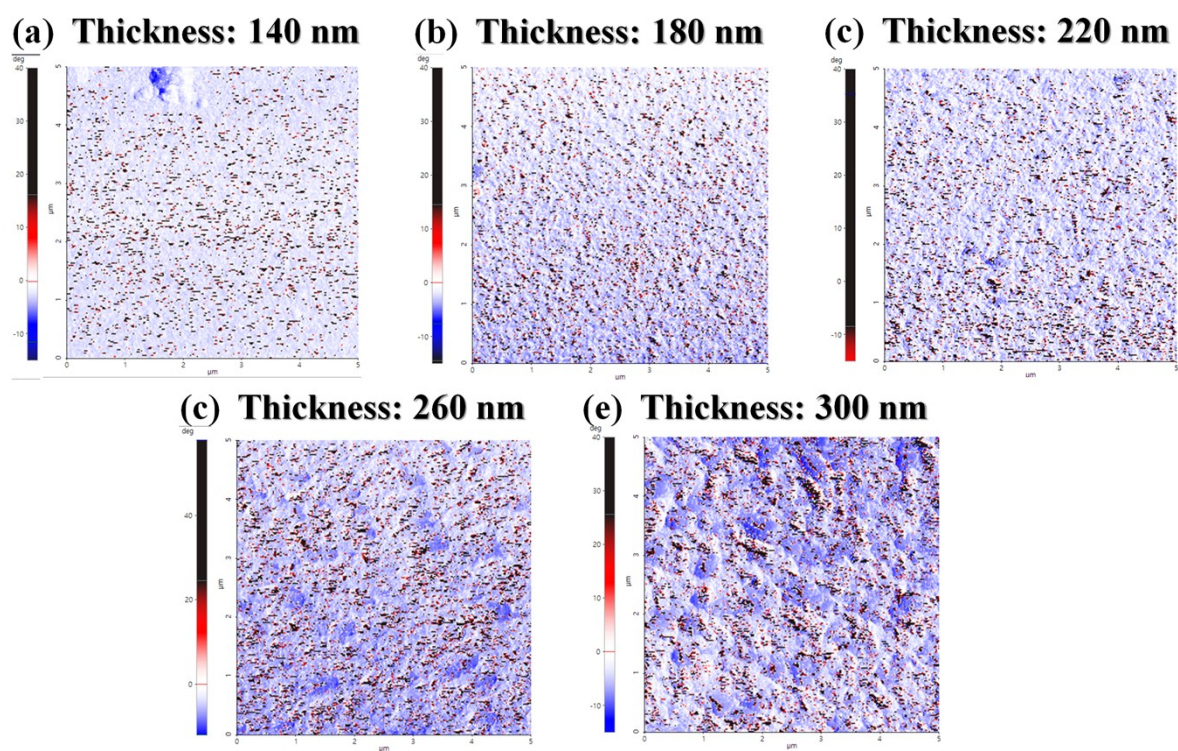

**Figure S8.** (a-e) Phase analysis of atomic force microscopy (AFM) images of the PM6:Y6 film depending on various thickness.

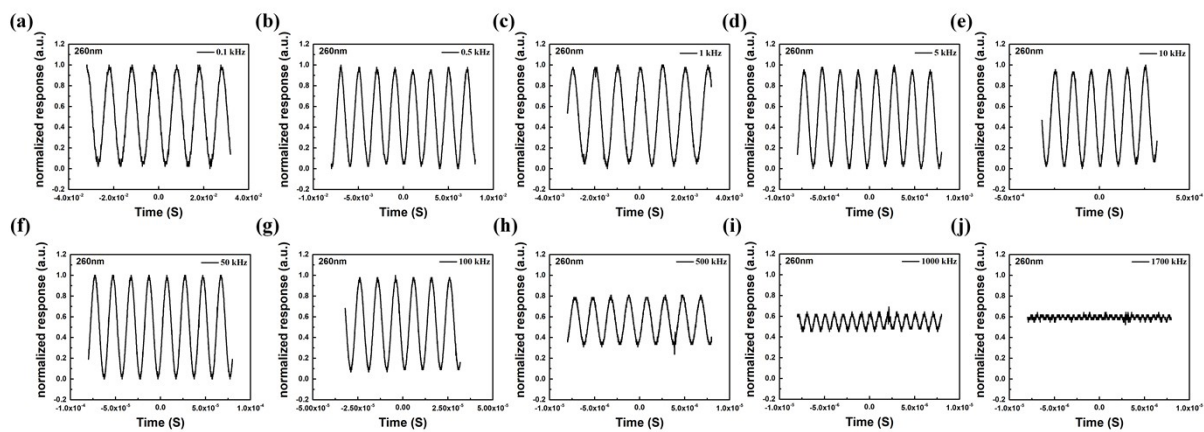

**Fig. S9. (a-j)** Normalized response characteristics of 140 nm PM6:Y6 OPD at 0 V; the frequency measurement range is from 0.1 to 1700 kHz.

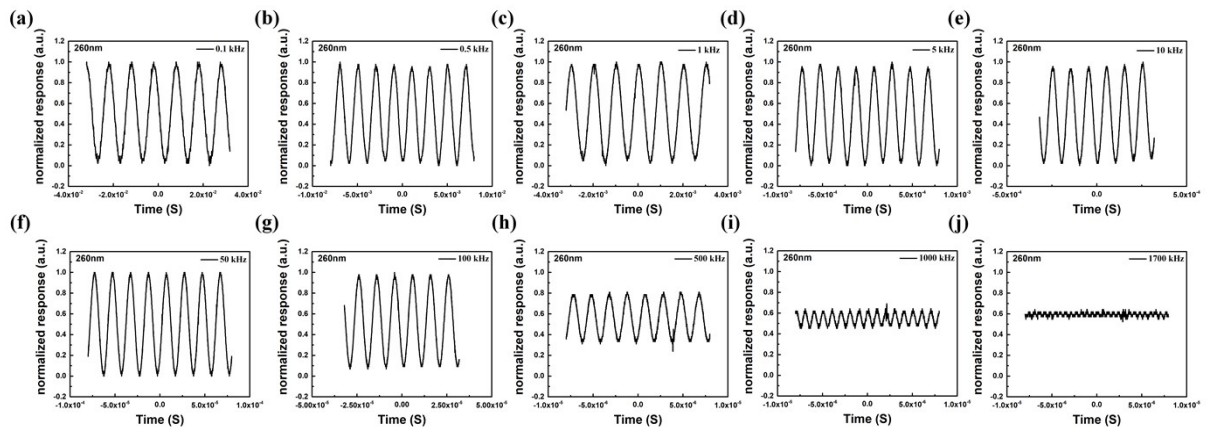

**Fig. S10.** (a-j) Normalized response characteristics of 260 nm PM6:Y6 OPD at 0 V; the frequency measurement range is from 0.1 to 1700 kHz.

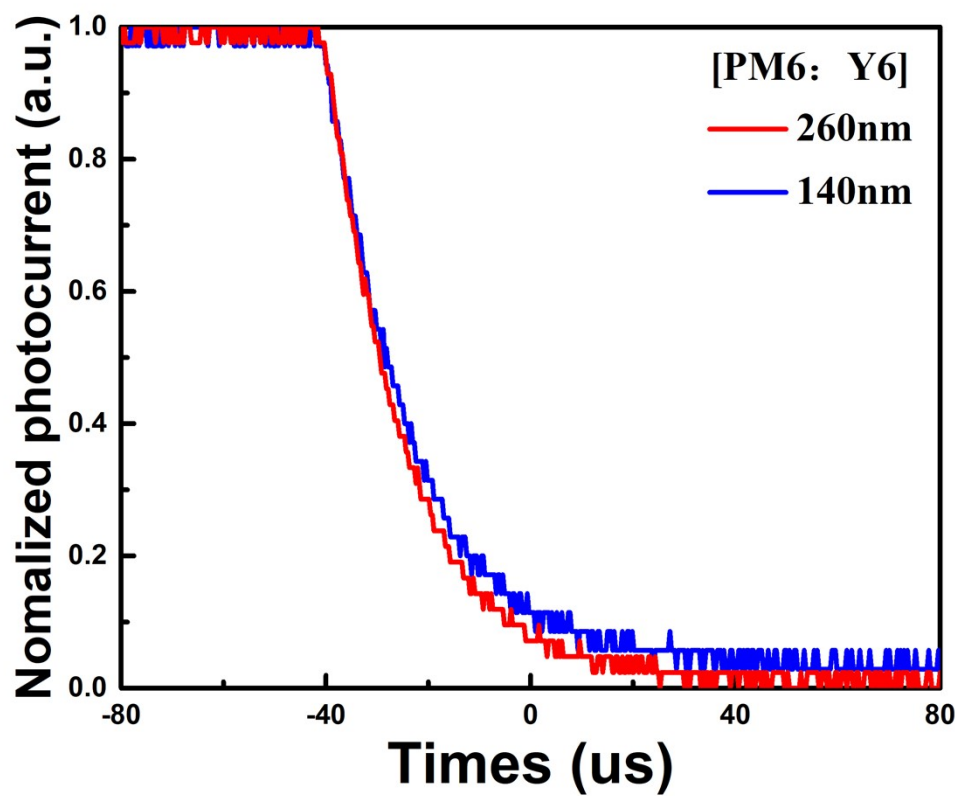

Fig. S11. Photoresponse times of thin and thick OPDs.

**Table S1.** Performance parameters of PM6:Y6-based devices according to active-layer thickness at  $-0.1$  V.

| <b>Cell</b> | <b><math>J_D @ -0.1</math> V</b><br><b>(A/cm<sup>2</sup>)</b> | <b><math>R_{max} @ -0.1</math> V</b><br><b>(A/W)</b> | <b><math>D^*_{max} @ -0.1</math> V</b><br><b>(Jones)</b> |
|-------------|---------------------------------------------------------------|------------------------------------------------------|----------------------------------------------------------|
| 140 nm      | $4.80 \times 10^{-5}$                                         | 0.498 @760 nm                                        | $1.27 \times 10^{11}$ @760 nm                            |
| 180 nm      | $7.13 \times 10^{-6}$                                         | 0.519 @770 nm                                        | $3.44 \times 10^{11}$ @770 nm                            |
| 220 nm      | $6.60 \times 10^{-7}$                                         | 0.566 @800 nm                                        | $1.23 \times 10^{12}$ @800 nm                            |
| 260 nm      | $1.99 \times 10^{-8}$                                         | 0.512 @830 nm                                        | $6.42 \times 10^{12}$ @830 nm                            |
| 300 nm      | $2.80 \times 10^{-7}$                                         | 0.452 @840 nm                                        | $1.49 \times 10^{12}$ @840 nm                            |

**Table S2.** Comparative performance chart of non-fullerene based NIR OPDs.

|                                                         |                        |                       | $J_{\text{dark}}$                                   | $D^*$                                                        | Refs.                                    |
|---------------------------------------------------------|------------------------|-----------------------|-----------------------------------------------------|--------------------------------------------------------------|------------------------------------------|
|                                                         |                        |                       | (A/cm <sup>2</sup> )                                | (Jones)                                                      |                                          |
|                                                         |                        |                       | $6.3 \times 10^{-6}$                                | $2.1 \times 10^{11}$                                         |                                          |
| Thickness<br>(nm)                                       | $R_s$<br>(k $\Omega$ ) | C<br>(F)              | Shot noise@0V<br>(-0.5 V)<br>(AHz <sup>-1/2</sup> ) | Thermal noise<br>(-0.5 V & 630 nm)<br>(AHz <sup>-1/2</sup> ) | Total noise@0V<br>(AHz <sup>-1/2</sup> ) |
| ITO/ZnO/P3HT:IR <sub>4</sub> T-BOC/MoO <sub>3</sub> /Ag |                        |                       | -                                                   | $4.28 \times 10^{12}$                                        |                                          |
| 140                                                     | 8.77                   | $5.39 \times 10^{-9}$ | $3.36 \times 10^{-14}$                              | (0 V & 830 nm)                                               | $1.37 \times 10^{-12}$                   |
| ITO/ZnO/PM6:PDTTIC-4F/MoO <sub>3</sub> /Ag              |                        |                       | $1.6 \times 10^{-9}$                                | $2.44 \times 10^{13}$                                        | [3]                                      |
| 140                                                     | 14.42                  | $4.65 \times 10^{-9}$ | $1.76 \times 10^{-14}$                              | (0 V & 920 nm)                                               | $1.07 \times 10^{-12}$                   |
| ITO/PEDOT:PSS/PM6:O4TFIC/Phen-NaDPO/Ag                  |                        |                       | $8.3 \times 10^{-5}$                                | $9 \times 10^{11}$                                           | [4]                                      |
|                                                         |                        |                       | (-2 V)                                              | (0 V & 915 nm)                                               |                                          |
| ITO/ZnO/PTB7-Th:COTCN2/MoO <sub>3</sub> /Ag             |                        |                       | $1.08 \times 10^{-7}$                               | $1.18 \times 10^{12}$                                        | [5]                                      |
|                                                         |                        |                       | (-0.5 V)                                            | (-0.5 V & 1000 nm)                                           |                                          |
| ITO/ZnO/PTB7-Th:COB/MoO <sub>3</sub> /Ag                |                        |                       | $2.26 \times 10^{-7}$                               | $2.84 \times 10^{11}$                                        | [6]                                      |
|                                                         |                        |                       | (-0.5 V)                                            | (-0.5 V & 915 nm)                                            |                                          |
| ITO/PEDOT:PSS/PM6:Y6/PDINN/Ag                           |                        |                       | $1.99 \times 10^{-8}$                               | $6.42 \times 10^{12}$                                        |                                          |
|                                                         |                        |                       | (-0.1 V)                                            | (-0.1 V & 830 nm)                                            |                                          |
|                                                         |                        |                       | $7.07 \times 10^{-10}$                              | $3.35 \times 10^{13}$                                        | This work                                |
|                                                         |                        |                       | (0 V)                                               | (0 V & 830 nm)                                               |                                          |

|     |        |                        |                        |                        |                        |
|-----|--------|------------------------|------------------------|------------------------|------------------------|
| 260 | 37.64  | $2.37 \times 10^{-9}$  | $1.35 \times 10^{-14}$ | $6.61 \times 10^{-13}$ | $6.61 \times 10^{-13}$ |
| 260 | 150.33 | $8.30 \times 10^{-10}$ | $5.82 \times 10^{-15}$ | $3.31 \times 10^{-13}$ | $3.31 \times 10^{-13}$ |

---

**Table S3.** Impedance-related parameters and noise component analysis of PM6:Y6 devices based on different active-layer thicknesses.

**Table S4.** Hole-only SCLC parameters of PM6:Y6 devices based on different active-layer thicknesses.

**Hole-only devices: ITO/PEDOT:PSS/PM6:Y6 (140 & 260 nm)/MoO<sub>3</sub>/Ag**

| Thickness<br>(nm) | V <sub>TFL</sub><br>(V) | N <sub>trap</sub><br>(#cm <sup>-3</sup> ) |
|-------------------|-------------------------|-------------------------------------------|
| 140               | 0.94                    | 2.09×10 <sup>16</sup>                     |
| 260               | 0.64                    | 4.13×10 <sup>15</sup>                     |



**Table S5.** Electron-only SCLC parameters of PM6:Y6 devices based on different active-layer thicknesses.

**Electron-only devices: ITO/ZnO/PM6:Y6 (140 & 260 nm)/PDINN/Ag**

| Thickness<br>( nm ) | $V_{TFL}$<br>( V ) | $N_{trap}$<br>( #cm <sup>-3</sup> ) |
|---------------------|--------------------|-------------------------------------|
| 140                 | 0.86               | $1.91 \times 10^{16}$               |
| 260                 | 0.75               | $4.84 \times 10^{15}$               |

## References:

- 1 Y. Jinde, X. Sui, G. Lu, L. Lv, J. Yu, J. Wu, X. Dong, X. Liu, A. Peng, H. Huang, Significant enhancement of responsivity of organic photodetectors upon molecular engineering, *J. Mater. Chem. C* 7 (2019) 5739. <https://doi.org/10.1039/C9TC00576E>.
- 2 T.J. Wen, D. Wang, L. Tao, Y. Xiao, Y.D. Tao, Y. Li, X. Lu, Y. Fang, C.Z. Li, H. Chen, D. Yang, Simple Near-Infrared Electron Acceptors for Efficient Photovoltaics and Sensitive Photodetectors, *ACS Appl. Mater. Interfaces* 12 (2020) 39515–39523. <https://doi.org/10.1021/ACSAMI.0C12100>.
- 3 Y. Chen, Y. Zheng, Y. Jiang, H. Fan, X. Zhu, Carbon-Bridged 1,2-Bis(2-Thienyl)ethylene: An Extremely Electron Rich Dithiophene Building Block Enabling Electron Acceptors with Absorption above 1000 nm for Highly Sensitive NIR Photodetectors, *J. Am. Chem. Soc.* 143 (2021) 4281–4289. <https://doi.org/10.1021/JACS.0C12818>
- 4 M. Babics, H. Bristow, W. Zhang, A. Wadsworth, M. Neophytou, N. Gasparini, I. McCulloch, Non-fullerene-based organic photodetectors for infrared communication, *J. Mater. Chem. C* 9 (2021) 2375–2380. <https://doi.org/10.1039/D0TC05341D>.
- 5 J.W. Ha, H.J. Eun, B. Park, H. Ahn, D.R. Hwang, Y.S. Shim, J. Heo, C. Lee, S.C. Yoon, J.H. Kim, S.J. Ko, Effect of Cyano Substitution on Non-Fullerene Acceptor for Near-Infrared Organic Photodetectors above 1000 nm, *Adv. Funct. Mater.* 33 (2023) 2211486. <https://doi.org/10.1002/ADFM.202211486>.
- 6 U.H. Lee, B. Park, S. Rhee, J.W. Ha, D.R. Whang, H.J. Eun, J.H. Kim, Y. Shim, J. Heo, C. Lee, B.J. Kim, S.C. Yoon, J. Lee, S.J. Ko, Achieving Highly Sensitive Near-Infrared Organic Photodetectors using Asymmetric Non-Fullerene Acceptor, *Adv. Opt. Mater.* 11 (2023) 2300312. <https://doi.org/10.1002/ADOM.202300312>.
